# Supplementary material for: Health-related quality of life and its determinants in patients with metastatic renal cell carcinoma
Source: Springer Nature journal article supplement (doi:10.1007/s11136-017-1704-4), 2017-09-15

Figure S1 shows the number of questionnaires collected at each time point. The number of questionnaires collected decreased with time. Figure S2 shows the number of questionnaires per patient.

**Figure S1. Number of questionnaires at each time point**

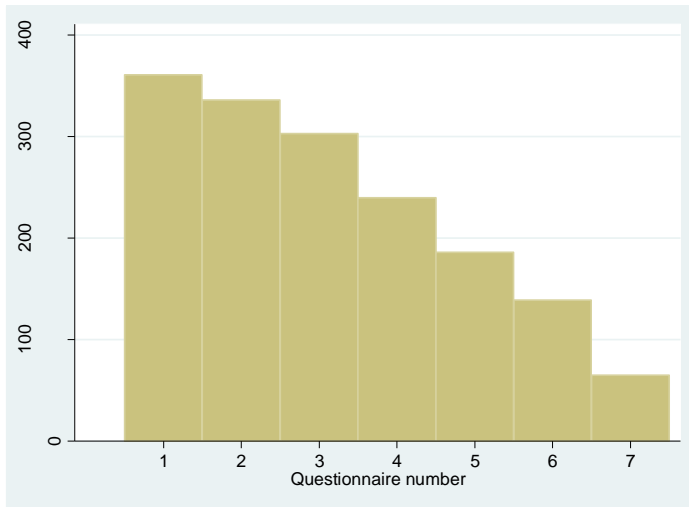

**Figure S2. Number of questionnaires per patient**

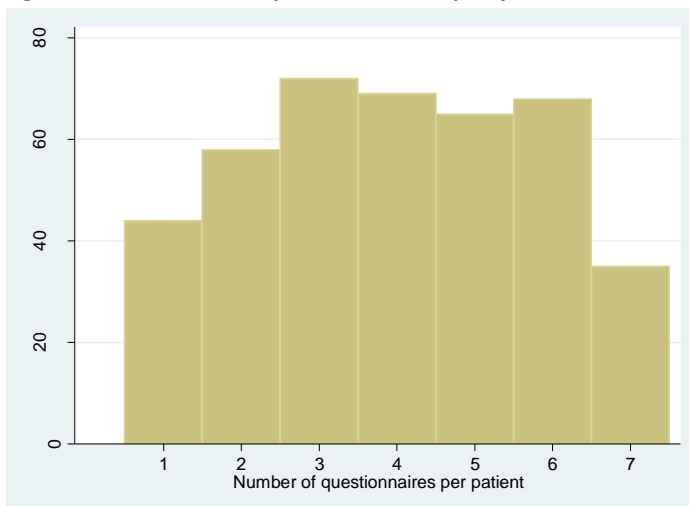

Figures S3 and S4 provide a summary of mean EORTC QLQ-C30 global health statuses and mean EQ-5D utilities by time (since diagnosis with metastatic disease).

**Figure S3. Mean EQ-5D utilities by time**

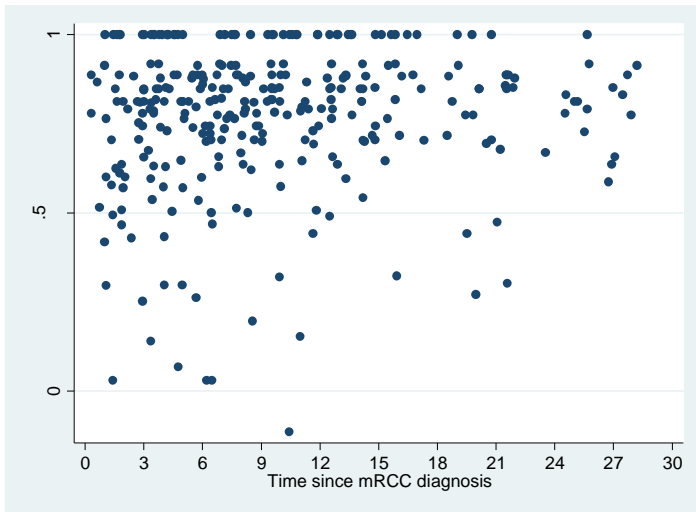

**Figure S4. Mean EORTC QLQ-C30 global health statuses by time**

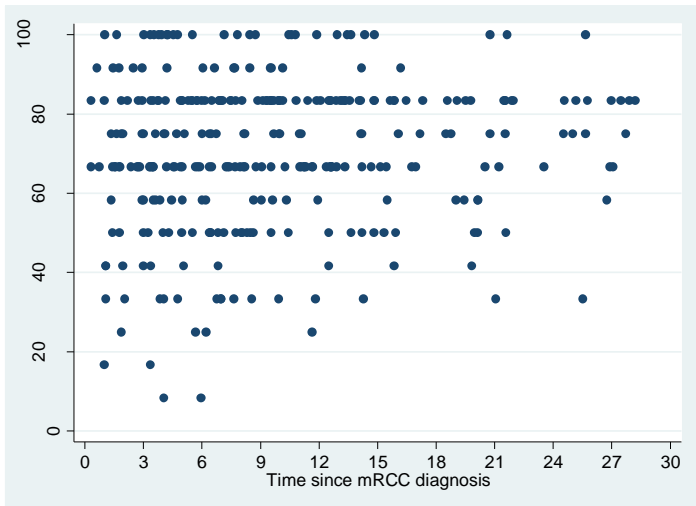

Supplement: MOESM1 [file 15065268]
